# Supplementary material for: Inhibition of Stat3‐mediated astrogliosis ameliorates pathology in an Alzheimer's disease model
Source: PubMed Central journal article supplement (PMC6365929; doi:10.15252/emmm.201809665), 2019-01-07

# Figure 3 Source Data

MW marker

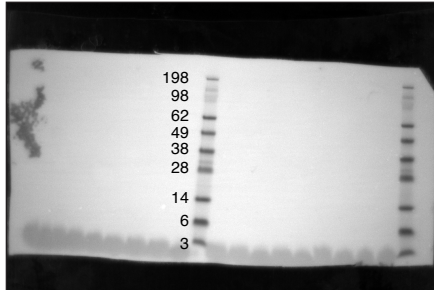

APP

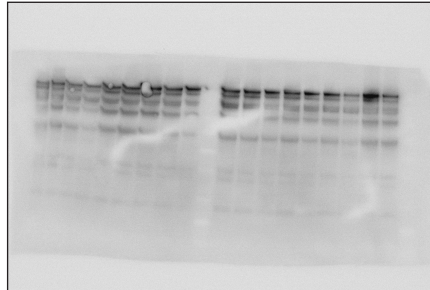

$\beta$ -Actin

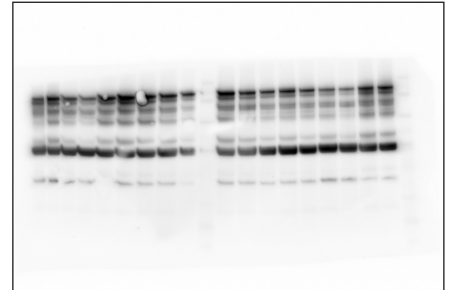

MW marker

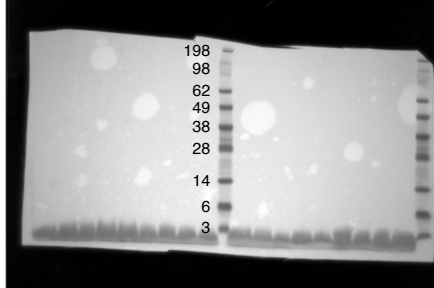

CTF

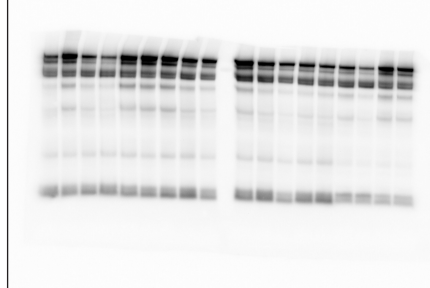

$\beta$ -Actin

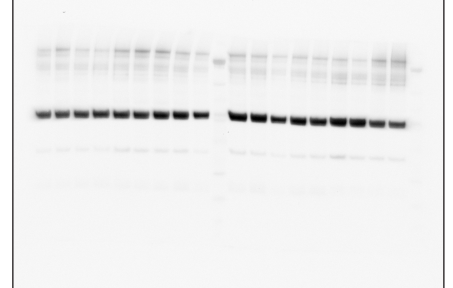

Supplement: EMMM-11-e9665-s004.pdf [file EMMM-11-e9665-s004.pdf]
