# Supplementary material for: Inhibition of Stat3‐mediated astrogliosis ameliorates pathology in an Alzheimer's disease model
Source: PubMed Central journal article supplement (PMC6365929; doi:10.15252/emmm.201809665), 2019-01-07
Supplement: EMMM-11-e9665-s005.pdf [file EMMM-11-e9665-s005.pdf]

# Figure 4 Source Data

MW marker

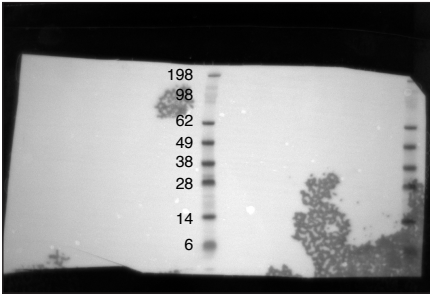

Neprilysin

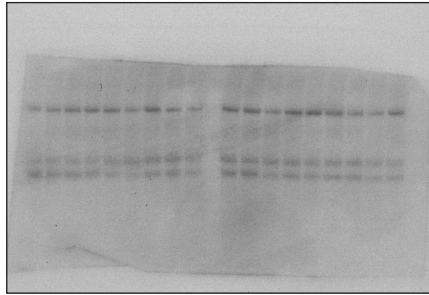

$\beta$ -Actin

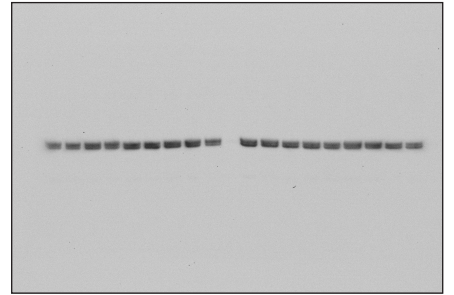

MW marker

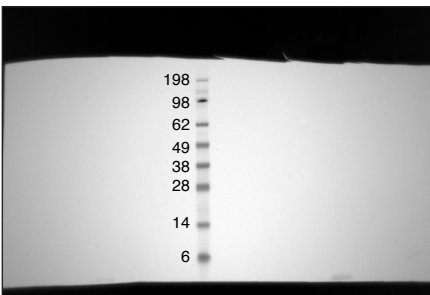

ApoE

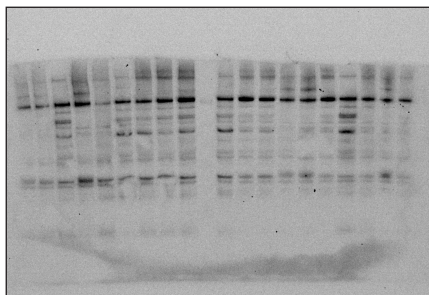

$\beta$ -Actin

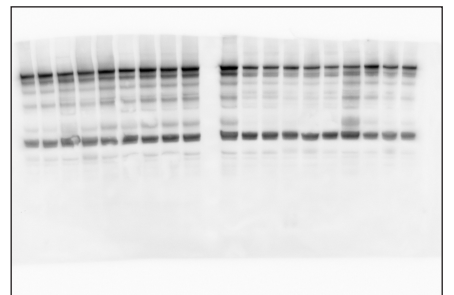

↑  
ref. protein

↑  
ref. protein

CD36 + MW marker

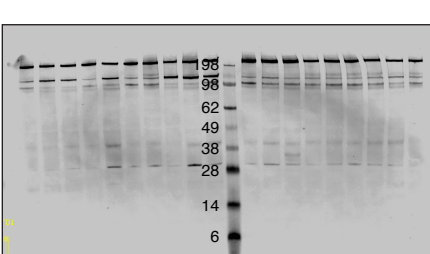

↑  
ref. protein

MW marker ( $\beta$ -Actin)

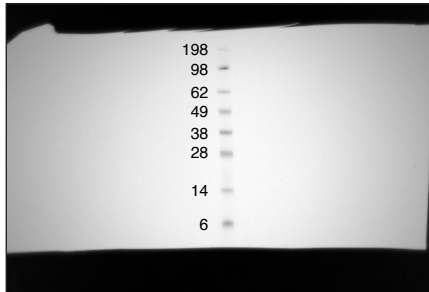

$\beta$ -Actin

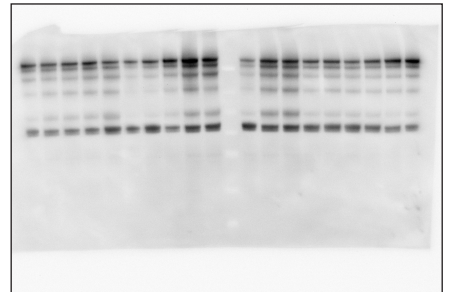

↑  
ref. protein

MW marker

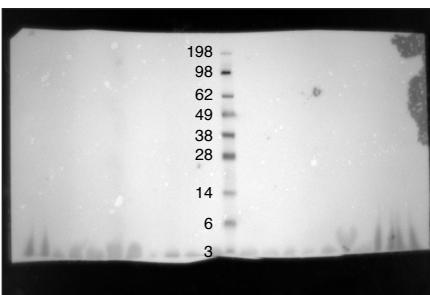

TREM2

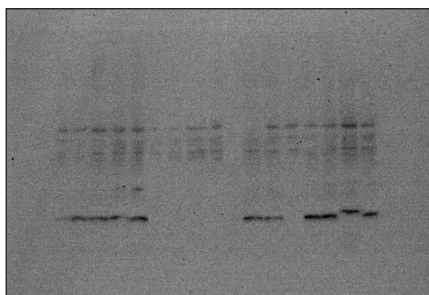

↑  
ref. protein

$\beta$ -Actin

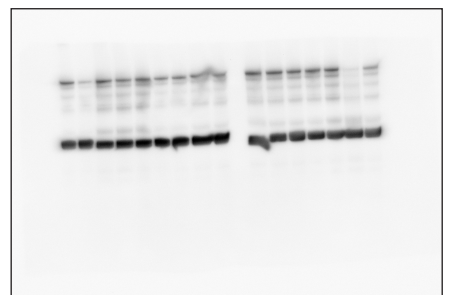

↑  
ref. protein
